# Supplementary material
Source: Springer Nature journal article supplement (https://www.springermedizin.de/resource/supplementary/12936_2012_2770_MOESM3_ESM.pdf/9544170)

M7-Dansyl

BF

1 hr

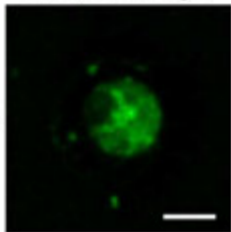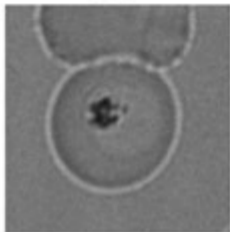

2 hr

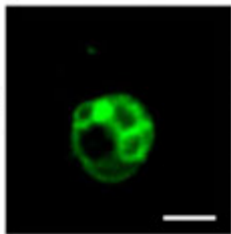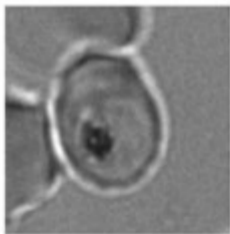

Supplement: MOESM3 [file 9544170]
